# Supplementary material for: Bayesian Analysis of the Glacial‐Interglacial Methane Increase Constrained by Stable Isotopes and Earth System Modeling
Source: PubMed Central journal article supplement (PMC6001704; doi:10.1002/2018gl077382), 2018-04-22
Supplement: GRL-45-3653-s001.pdf [file GRL-45-3653-s001.pdf]

**1 Supporting Information for "Bayesian analysis of the**  
**2 glacial-interglacial methane increase constrained by**  
**3 stable isotopes and Earth System modelling"**

Peter O. Hopcroft<sup>1,2,3</sup>, Paul J. Valdes<sup>1,2</sup> & Jed O. Kaplan<sup>4,5</sup>

---

Corresponding author: P. O. Hopcroft, School of Geography, Earth and Environmental Science,  
University of Birmingham, Edgbaston, U.K. (p.hopcroft@bham.ac.uk)

<sup>1</sup>Bristol Research Initiative for the

## 1. HadGEM2-ES simulations

4 HadGEM2-ES is a coupled general circulation model [*HadGEM2 Development Team,*  
5 2011] with interactive Earth System components that has been widely used to study past  
6 [*Kandlbauer et al., 2013; Hopcroft and Valdes, 2015*], present [*Booth et al., 2012*] and  
7 future climate change [*Caesar et al., 2013*], including as part of CMIP5 [*Jones et al.,*  
8 2011]. HadGEM2-ES incorporates schemes for vegetation [*Cox, 2001*], wetlands [*Gedney*  
9 *et al., 2004*], tropospheric aerosols and tropospheric chemistry [*O'Connor et al., 2014*].  
10 The full ES configuration [*Collins et al., 2011*] includes coupled 3D atmosphere and ocean

---

Dynamic Global Environment, School of  
Geographical Sciences, University of Bristol,  
U.K.

<sup>2</sup>Cabot Institute, University of Bristol,  
U.K.

<sup>3</sup>Now at the School of Geography, Earth  
and Environmental Sciences, University of  
Birmingham, Edgbaston, U.K.

<sup>4</sup>Max Planck Institute for the Science of  
Human History, Jena, Germany.

<sup>5</sup>ARVE Research SARL, Pully,  
Switzerland.

11 general circulation models and a dynamic sea-ice scheme [*HadGEM2 Development Team,*  
12 2011]. Here we utilise an atmosphere-only version in which sea surface temperature (SST)  
13 fields and sea-ice are prescribed based on pre-industrial and last glacial maximum (LGM)  
14 simulations with HadCM3 [*Singarayer and Valdes, 2010*].

15 Leaf internal CO<sub>2</sub> is not routinely output by the model, but is used in the calculation  
16 of stomatal conductance and photosynthesis [*Cox, 2001*]. We used this parameter in  
17 the formulation of *Lloyd and Taylor* [1994] to predict the isotopic carbon discrimination  
18 of terrestrial vegetation within the model for the pre-industrial and LGM time periods.  
19 For this we followed the implementation of *Kaplan et al.* [2002]. These simulations are  
20 otherwise identical to the atmosphere-only (without chemistry simulations) reported by  
21 *Hopcroft et al.* [2017].

## 2. Offline CH<sub>4</sub> sources used in HadGEM2-ES

22 Wetland CH<sub>4</sub> emissions are computed within HadGEM2-ES at each model timestep  
23 [*Collins et al., 2011*]. Wetland area is calculated with a TOPMODEL scheme [*Gedney*  
24 *et al., 2004*] and configured with a recently derived high-resolution topographic index  
25 dataset [*Marthews et al., 2015*], which quantifies the propensity of the topography for  
26 subgrid areas of soil moisture saturation.

27 Emissions from biomass burning were simulated using LPJ-LMfire [*Pfeiffer et al., 2013*]  
28 and were scaled to give a pre-industrial flux of 21TgCH<sub>4</sub>yr<sup>-1</sup>. This represents a 50% in-  
29 crease on the value used by H17 which was taken from the pre-industrial value for 1850  
30 used in CMIP5. This higher value is consistent with 25TgCH<sub>4</sub>yr<sup>-1</sup> inferred by *Ferretti*  
31 *et al.* [2005] but is lower than some model-based estimates [e.g. *Thonicke et al., 2005,*

32 simulated a pre-industrial flux of 37 TgCH<sub>4</sub>yr<sup>-1</sup>]. This higher value also gives a superior  
33 fit to observed CH<sub>4</sub> isotopic data for the pre-industrial simulation, as compared with using  
34 the value of 14.3 TgCH<sub>4</sub>yr<sup>-1</sup> from H17.

35 We considered three scenarios of LGM biomass burning fluxes. The first is termed  
36 standard and follows the simulations using LPJ-LMfire for the pre-industrial and LGM.  
37 The second is low-fire and sets all fire emissions at the LGM to 10% of the pre-industrial  
38 fluxes. The final employs a different version of LPJ-LMfire in which an estimated hu-  
39 man contribution to biomass burning during the LGM is included following the methods  
40 described by *Kaplan et al.* [2016].

41 The ocean CH<sub>4</sub> emissions used by *Hopcroft et al.* [2017] were scaled down to 1TgCH<sub>4</sub>yr<sup>-1</sup>  
42 in line with more recent estimates [*Kirschke et al.*, 2013]. An empirically-based method to  
43 predict termite CH<sub>4</sub> emissions as a function of vegetation cover based on data of *Sanderson*  
44 [1996] was employed using simulations with the BIOME4 vegetation model [*Kaplan et al.*,  
45 2003]. The pre-industrial source was scaled to 20TgCH<sub>4</sub>yr<sup>-1</sup>. The hydrate CH<sub>4</sub> source  
46 was set to 10TgCH<sub>4</sub>yr<sup>-1</sup> following previous studies [*O'Connor et al.*, 2014]. We include  
47 a further non-hydrate geological term to account for sources identified by *Etioppe et al.*  
48 [2008], and set this to equal the hydrate flux.

49 To address uncertainty in the representation of wetland processes, we also ran offline  
50 simulations using a peatland and permafrost model for northern hemisphere extra-tropical  
51 CH<sub>4</sub> emissions [*Wania et al.*, 2010]. This gives a stronger pre-industrial extra-tropical  
52 methane flux, but also leads to a larger relative change at the LGM.

### 3. Atmospheric CH<sub>4</sub> box model

We use a three box model of tropospheric CH<sub>4</sub> concentration and its two isotopes similar to the two box model presented by *Miller* [2005]. Three equal area boxes have boundaries at approximately 20°S and 20°N. These boundaries are used to calculate regional averages from HadGEM2-ES coupled model simulations that are fed into the box model. The applied box model formulation yields six unknowns and six equations:

$$\frac{dB_N}{dt} = S_N - k_{12}B_N - k_{ex}(B_N - B_T) \quad (1)$$

$$\frac{dB_T}{dt} = S_T - k_{12}B_T - k_{ex}(B_T - B_N) - k_{ex}(B_T - B_S) \quad (2)$$

$$\frac{dB_S}{dt} = S_S - k_{12}B_S - k_{ex}(B_S - B_T) \quad (3)$$

$$(4)$$

and

$$\frac{d\delta_N}{dt} = \frac{\Sigma_N^i}{B_N} - \epsilon k_{12} - \frac{S_N \delta_N}{B_N} + k_{ex} \frac{B_T}{B_N} (\delta_N - \delta_T) \quad (5)$$

$$\frac{d\delta_T}{dt} = \frac{\Sigma_T^i}{B_T} - \epsilon k_{12} - \frac{S_T \delta_T}{B_T} + k_{ex} \frac{B_N}{B_T} (\delta_T - \delta_N) + k_{ex} \frac{B_S}{B_T} (\delta_T - \delta_S) \quad (6)$$

$$\frac{d\delta_S}{dt} = \frac{\Sigma_S^i}{B_S} - \epsilon k_{12} - \frac{S_S \delta_S}{B_S} + k_{ex} \frac{B_T}{B_S} (\delta_S - \delta_T) \quad (7)$$

Here  $B$  is atmospheric burden (TgCH<sub>4</sub>),  $S$  is the source term (TgCH<sub>4</sub>yr<sup>-1</sup>),  $k_{12}$  is the inverse of atmospheric lifetime (yr<sup>-1</sup>),  $k_{ex}$  is the exchange timescale between the boxes (=1.0 yr<sup>-1</sup>).  $\epsilon$  is the atmospheric fractionation term,  $\delta$  is the CH<sub>4</sub> isotopic signature (‰) and  $\Sigma_N^i$  is the source weighted isotopic signature of all of the source terms (‰). The

subscripts  $N$ ,  $T$  and  $S$  refer to the northern, tropical and southern boxes. Steady state is assumed in each time period, so the left hand terms are set to zero.

This treatment introduces a small approximation from not treating the two isotopes separately [Lassey *et al.*, 2000] that is likely small compared with other uncertainties.

The global mean surface CH<sub>4</sub> concentration is calculated as the sum of the burden (Tg) in each box divided by  $k$  ( $=2.75 \text{ TgCH}_4\text{ppbv}^{-1}$ ).  $k$  reduced by 2.7% for the LGM following Hopcroft *et al.* [2017]. For comparison with the observations, the northern or southern box are compared with the ice-core data from Greenland or Antarctica respectively, as listed in table S1.

#### 4. Potential effect of temperature-dependent fractionation during methanogenesis and soil uptake

The isotopic composition of wetland CH<sub>4</sub> is a function of leaf  $\delta^{13}\text{C}$  (as the substrate for methanogenesis), the methanogenesis pathway and other environmental factors [Whiticar, 1999]. The dependence of fractionation is not well understood [Conrad, 2005; Schaefer and Whiticar, 2008]. There is evidence of a temperature dependence of isotopic fractionation in the production of CH<sub>4</sub> via the carbonate reduction pathway [Blair *et al.*, 1993], but the isotopic kinetic effect is not well understood for methyl fermentation pathways, and the balance between these two pathways and the response of this balance to global climate change remains highly uncertain. Additionally, field experiments suggest that the ratio of net to gross production of CH<sub>4</sub> is insensitive to temperature [Moosavi and Crill, 1998], and hence we do not consider this as a factor that modifies the CH<sub>4</sub> isotopic signature for the glacial to interglacial change.

83 The fractionation of the carbonate reduction component of global wetland methanogen-  
84 esis is temperature dependent. We used equation 2 of *Schaefer and Whiticar* [2008] with  
85 monthly simulated surface air temperatures and wetland CH<sub>4</sub> emissions in HadGEM2 late  
86 pre-industrial and LGM simulations. Assuming a carbonate reduction fraction of 30% of  
87 total emissions in both time periods, we obtain a change in wetland isotopic signature of  
88 -0.3 ‰. This is at the lower end of the values calculated using estimated global mean  
89 temperature changes by *Schaefer and Whiticar* [2008]. This has a very small impact on  
90 the global  $\delta^{13}\text{CH}_4$  result.

91 We use the monthly simulated surface air temperatures in HadGEM2 and monthly  
92 soil uptake rates (from H17) for the late pre-industrial and LGM to calculate the effect  
93 of temperature on fractionation during soil uptake. This uses the empirically-derived  
94 relationship from fig 2a of *Tyler et al.* [1994]. This gives late pre-industrial and LGM soil  
95 uptake KIEs of -1.0190 and -1.0210, compared with estimates modern range of [-1.017,  
96 -1.022] and a LGM value of -1.0272 [*Whiticar and Schaefer, 2007*]. Because of the small  
97 contribution of the soil sink to the overall budget, this fractionation change of -2 ‰ has  
98 a negligible impact on the atmospheric  $\delta^{13}\text{CH}_4$ .

## 5. JULES simulations of carbon isotope discrimination by global vegetation

99 We used the Joint UK Land Environment Simulator (JULES) version 4.1 which has  
100 9 plant functional types [*Harper et al., 2016*]. JULES was driven with 3-hourly climate  
101 forcing for surface air temperature, precipitation, air pressure, wind speed, specific hu-  
102 midity and diffuse fraction of incident radiation, as archived from pre-industrial and LGM  
103 simulations with HadGEM2-ES. Atmospheric CO<sub>2</sub> was prescribed as in the HadGEM2-ES

104 simulations for the pre-industrial (280 p.p.m.) or LGM (185 p.p.m.). After an 80 year  
 105 spin up, the dynamic vegetation is deactivated so that the distribution of vegetation types  
 106 does not evolve in response to the sensitivity simulations.

107 An ensemble of 8 simulations was performed:

- 108 1. Pre-industrial
- 109 2. LGM
- 110 3. Pre-industrial with LGM vegetation distribution
- 111 4. Pre-industrial with LGM CO<sub>2</sub>
- 112 5. Pre-industrial with LGM climate
- 113 6. LGM with pre-industrial CO<sub>2</sub>
- 114 7. LGM with pre-industrial climate
- 115 8. LGM with pre-industrial vegetation distribution

116 For LGM with pre-industrial vegetation, the new land areas at the LGM (i.e. exposed  
 117 continental shelves) are prescribed as a combination of 25% broadleaf trees, grasses, shrubs  
 118 and bare soil. For the pre-industrial with LGM vegetation, the LGM ice-sheet areas are  
 119 prescribed as bare soil.

The influence of a given variable  $x$  (= climate, CO<sub>2</sub>, etc) is quantified relative to either  
 base state (PI or LGM) as:

$$\Delta\delta^{13}C(x)_{PI} = \Delta\delta^{13}C(\text{PI with LGM } x) - \Delta\delta^{13}C(\text{PI}), \quad (8)$$

$$\Delta\delta^{13}C(x)_{LGM} = \Delta\delta^{13}C(\text{LGM}) - \Delta\delta^{13}C(\text{LGM with PI } x) \quad (9)$$



120 The results of these calculations are shown in figure S1 and are discussed in the main  
121 text.

## 6. Sensitivity tests with the Bayesian algorithm

### 6.1. Observational uncertainties

122 The observational uncertainties listed in table S1 do not account for uncertainties in  
123 translating modelled values to the real world point locations. We therefore re-ran the  
124 Bayesian algorithm with these uncertainties values doubled (figure S2). The resulting  
125 PDFs are compared with the default values presented in the main text in figure 3. In this  
126 case the assumed two sigma is 24% and 85% of the LGM to late pre-industrial difference  
127 for  $\delta^{13}\text{CH}_4$  and deuterium, respectively.

128 With these larger uncertainty estimates, the model is much less able to reproduce the  
129 observed  $\delta^{13}\text{CH}_4$  and deuterium values, and as a result infers a larger biomass burning  
130 reduction and little change in the geological flux.

### 6.2. Prior uncertainties

131 The impact of the choice of prior uncertainty terms was tested by doubling these values  
132 for each source (figure S3). This results in much wider posterior distributions. The strong  
133 reduction in wetland terms is consistent, but now the biomass burning flux increases  
134 slightly, with a posterior mean of  $17.0 \pm 3.4 \text{ TgCH}_4\text{yr}^{-1}$ , whilst the posterior standard  
135 deviations of the geological and termite terms increase by 70-80%. However, with a  
136 posterior mean of  $10.5 \text{ TgCH}_4\text{year}^{-1}$ , the inferred geological term is identical to the default  
137 example which is close to the pre-industrial flux, whilst the inferred mean biomass burning  
138 flux is still only 81% of the pre-industrial value.

139 With uniform priors, the posterior distributions show even stronger reductions in both  
140 extra-tropical and tropical wetlands (for example, the posterior mean for tropical wet-  
141 lands is 61% lower than the prior mean). The posterior distributions for biomass burning  
142 and geological emissions are qualitatively different with the use of uniform prior distribu-  
143 tions. However, with much wider posterior distributions (standard deviations increase by  
144 1.8 Tgyr<sup>-1</sup> for hydrates and 3.8 Tgyr<sup>-1</sup> for termites), the mean values are rather similar to  
145 those presented in figure 3. The termite and hydrate terms are inferred to be significantly  
146 higher and lower respectively, than assumed with the original Gaussian prior, but the  
147 termite result is inconsistent with the best estimate for the LGM emission strength (H17)  
148 in which termite emissions are modelled to reduce substantially at the LGM because of  
149 reduced tropical forest coverage.

### 6.3. Testing with pre-industrial observations

150 The Bayesian Markov chain Monte Carlo (MCMC) methodology was also tested by im-  
151 posing the LGM priors but using pre-industrial CH<sub>4</sub> concentration and isotope observa-  
152 tions instead of those for the LGM. That is, the algorithm is given LGM prior information  
153 but is conditioned on pre-industrial observations.

154 This prior constitutes LGM values for wetlands, biomass burning and termites, and  
155 pre-industrial values for the remaining sources (hydrates and geological). The modelled  
156 LGM shift in isotopic signatures of wetland and biomass burning CH<sub>4</sub> were omitted.

157 The results are shown in figure S5. In this case the Bayesian inference recovers the  
158 observations. Interestingly the algorithm does not fully reconstruct the pre-industrial  
159 biomass burning source, and instead infers too strong a wetland source for the tropics.

<sup>160</sup> This could be caused by imposing the LGM prior information. It illustrates the limits of  
<sup>161</sup> this inference process because of the limited number of observations that are constraining  
<sup>162</sup> the algorithm.

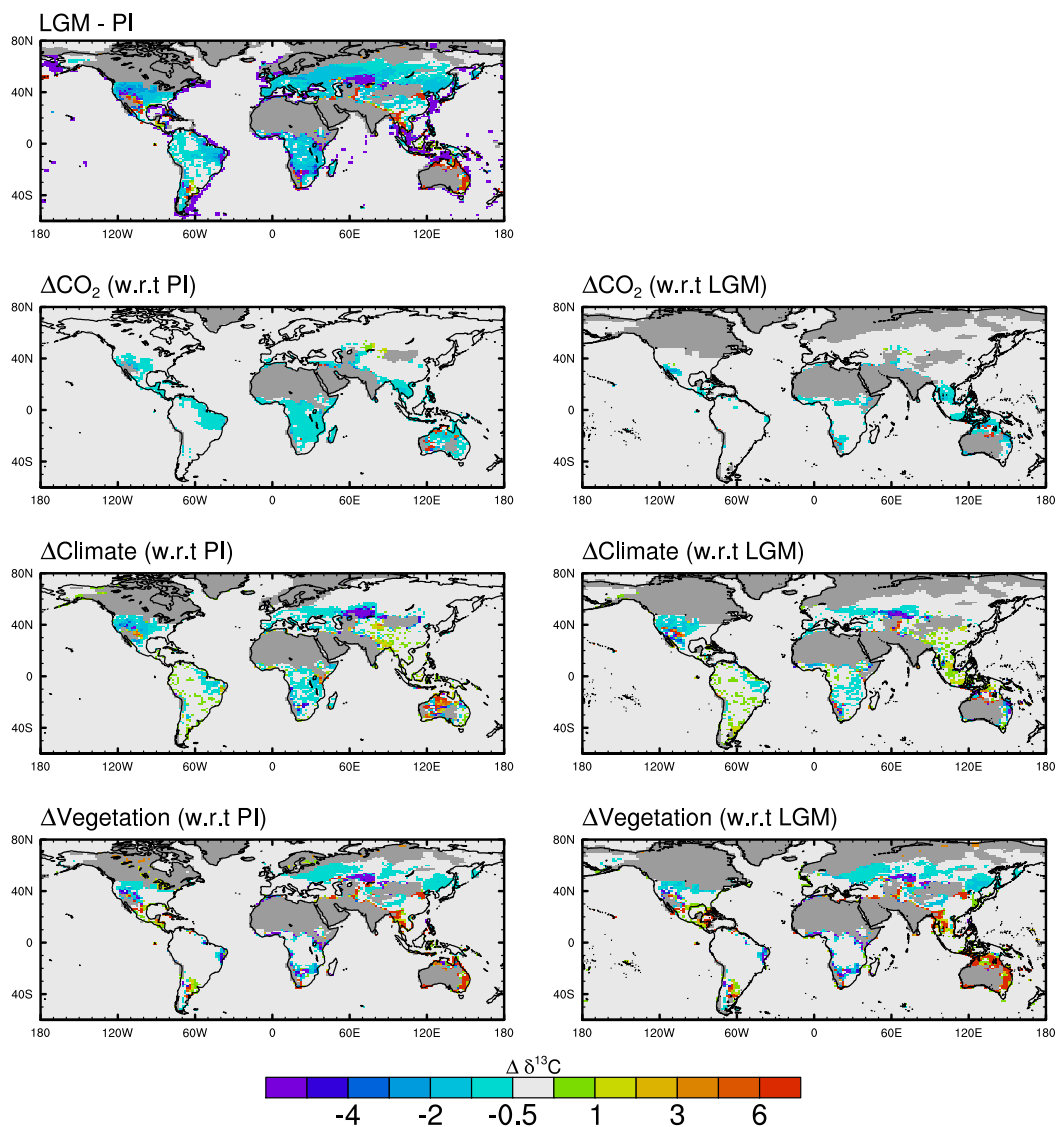

**Figure S1.** Offline JULES simulations of leaf  $\delta^{13}C$  and the separate effects of climate, CO<sub>2</sub> and the vegetation distribution. The calculations are performed relative to the pre-industrial state (left column) or the LGM state (right column). Gridcells dominated by glaciers and deserts are masked.

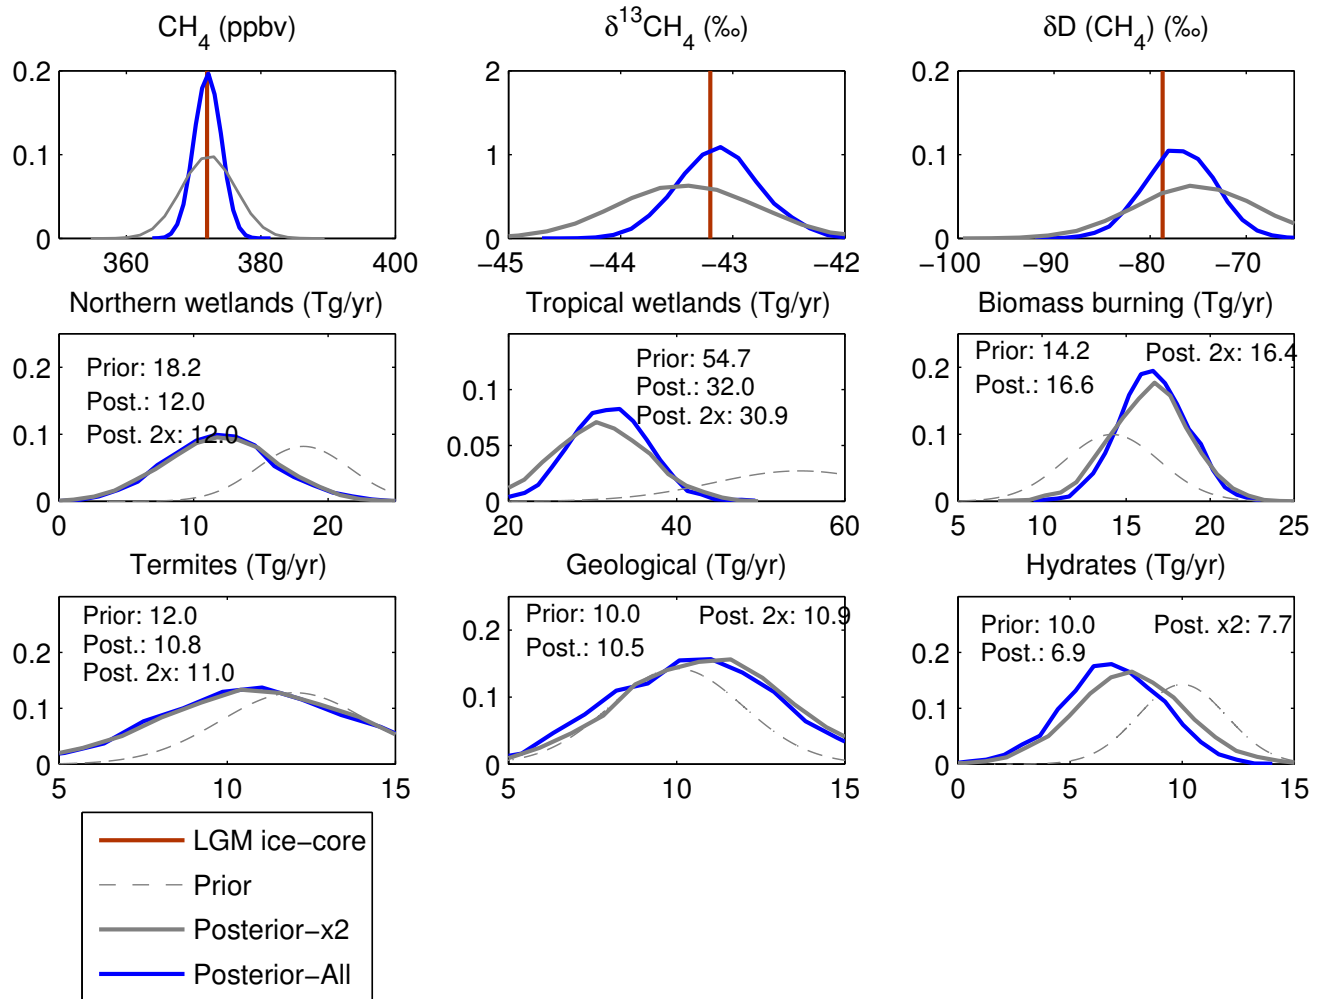

**Figure S2.** As in figure 3 of the main text, but comparing with a case where the observational uncertainties are doubled for both the late pre-industrial and the LGM (labelled as -x2). The default results reproduced from figure 3 of the main text are shown in blue for comparison.

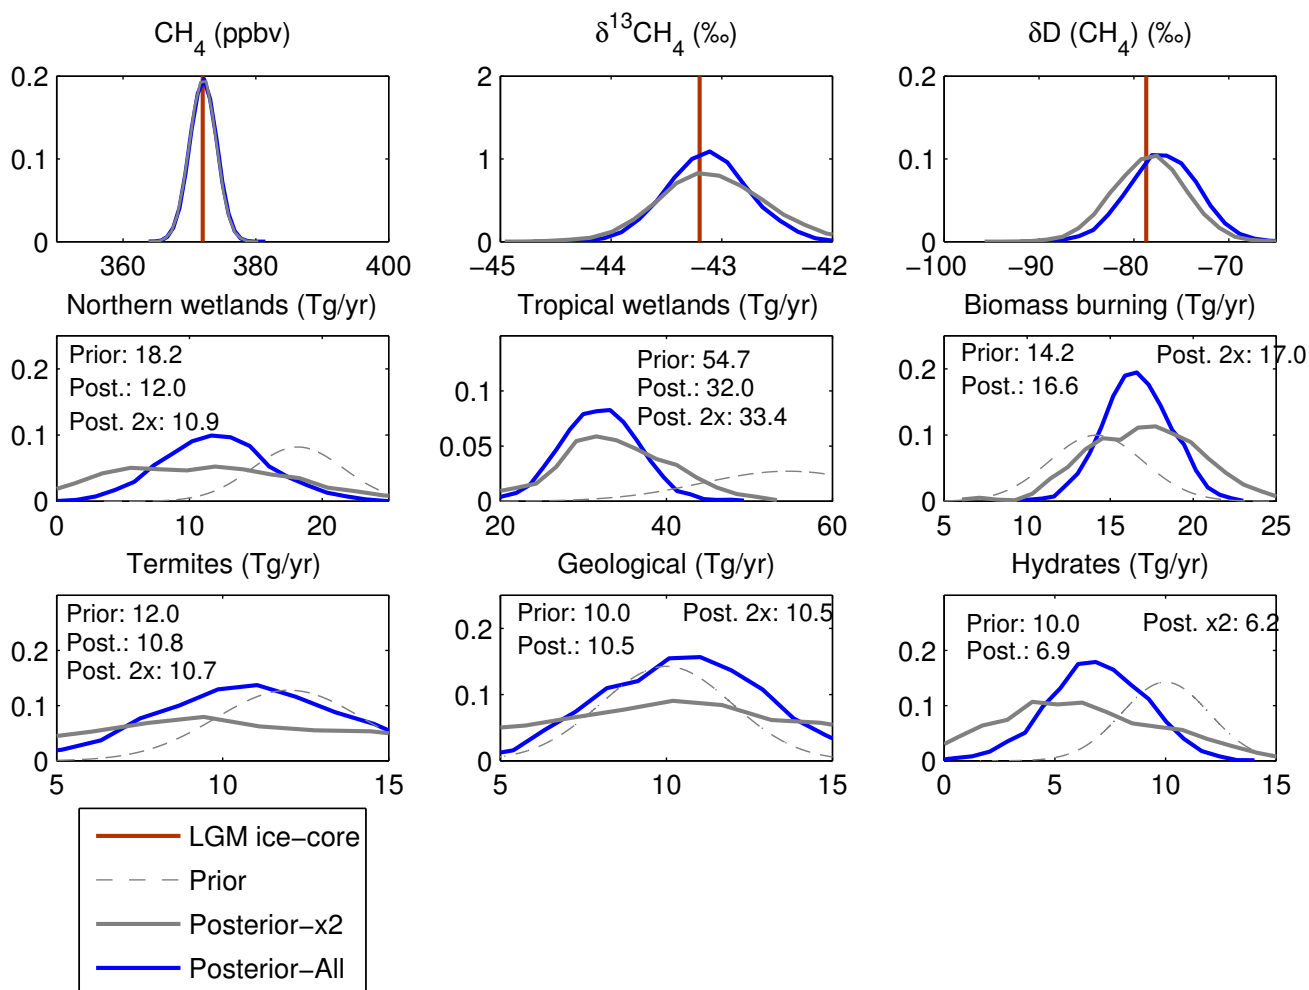

**Figure S3.** As in figure 3 of the main text, but comparing with a case where the uncertainties in the prior distributions on the CH<sub>4</sub> source terms are doubled (labelled as -x2). The default results reproduced from figure 3 of the main text are shown in blue for comparison.

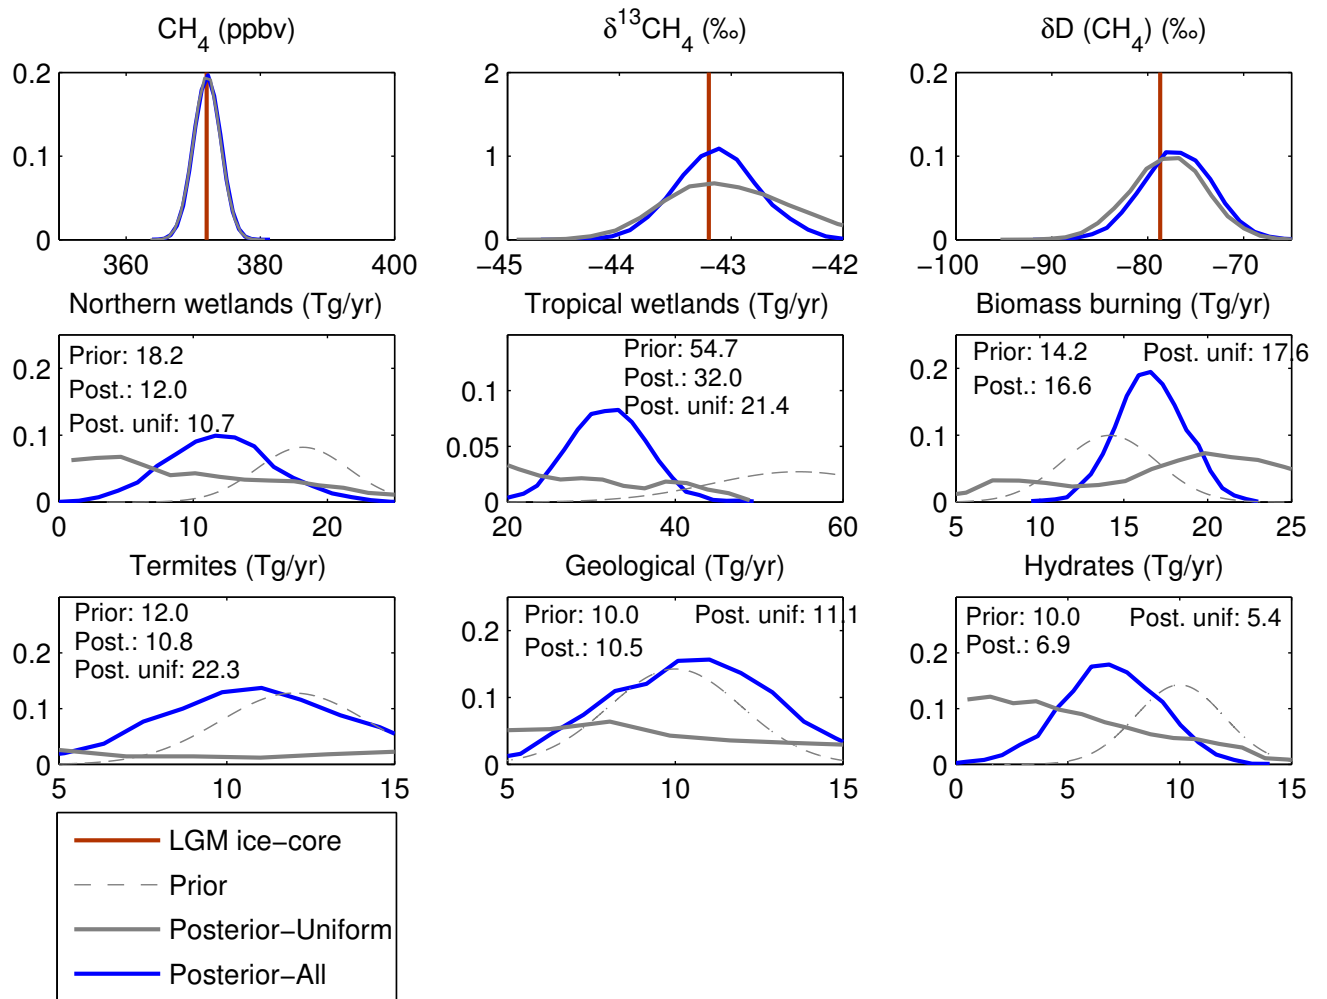

**Figure S4.** As in figure 3 of the main text, but comparing the default case with that using uniform prior distributions for all source terms with ranges (0,100) Tg/year for wetlands and (0,40) Tg/yr for other sources. The default results reproduced from figure 3 of the main text are shown in blue for comparison.

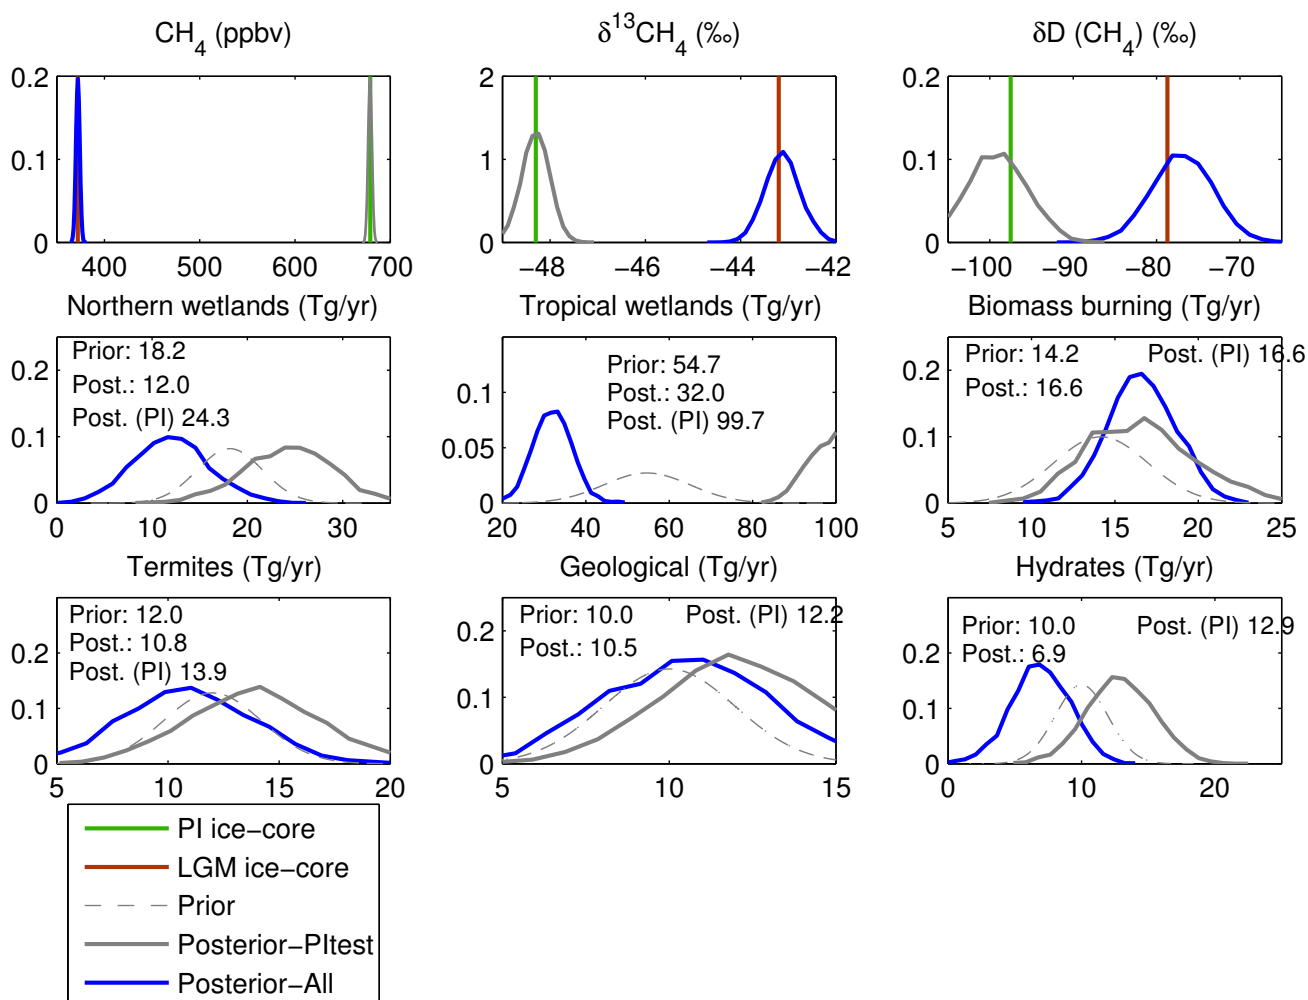

**Figure S5.** As in figure 3 of the main text, but now using pre-industrial observations and LGM prior information described in the main text (labelled as -PItest). The default results reproduced from figure 3 of the main text are shown in blue for comparison.



<sup>163</sup> **Table S1.** Paleo- methane measurements from ice-cores, with timings, core name and the location in the three box model (North or South) and estimated measurement uncertainties.

| Time                                               | Age (kyr BP) | Mean  | $\pm 1$ s.d. | Ice core (Box) | Reference                                 |
|----------------------------------------------------|--------------|-------|--------------|----------------|-------------------------------------------|
| <b>CH<sub>4</sub> (ppbv)</b>                       |              |       |              |                |                                           |
| PI                                                 | 0.4-1.2      | 679   | 2            | WAIS (S)       | <i>Mitchell et al.</i> [2013]             |
| LGM                                                | 19.0-23.0    | 372   | 2            | EDC (S)        | <i>WAIS Divide Project Members</i> [2015] |
| <b><math>\delta^{13}\text{CH}_4</math>(‰)</b>      |              |       |              |                |                                           |
| PI                                                 | 0.4-1.2      | -48.3 | 0.3          | GISP2 (N)      | <i>Sowers</i> [2010]                      |
| LGM                                                | 19.3-22.4    | -43.2 | 0.3          | EDML (S)       | <i>Möller et al.</i> [2013]               |
| <b><math>\delta\text{D}(\text{CH}_4)</math>(‰)</b> |              |       |              |                |                                           |
| PI                                                 | 0.4-1.2      | -97.5 | 3.0          | GISP2 (N)      | <i>Sowers</i> [2010]                      |
| LGM                                                | 19.1-23.1    | -78.7 | 4.2          | GISP2 (N)      | <i>Sowers</i> [2006]                      |

**Table S2.** Methane source and sink isotopic signature mean values and references.

|                     | $\delta^{13}\text{CH}_4$ | References                                                                                            | $\delta\text{D}(\text{CH}_4)$ | References                                                         |
|---------------------|--------------------------|-------------------------------------------------------------------------------------------------------|-------------------------------|--------------------------------------------------------------------|
| Extra-trop. wetland | -62                      | <i>Thornton et al.</i> [2016]; <i>Sherwood et al.</i> [2017]                                          | -375 <sup>a</sup>             | <i>Whiticar and Schaefer</i> [2007]; <i>Sherwood et al.</i> [2017] |
| Tropical wetland    | -58                      | <i>Fisher et al.</i> [2017]<br><i>Sherwood et al.</i> [2017]                                          | -360 <sup>a</sup>             | <i>Whiticar and Schaefer</i> [2007]; <i>Sherwood et al.</i> [2017] |
| Biomass burning     | -23                      | <i>Snover et al.</i> [2000]                                                                           | -211                          | <i>Sherwood et al.</i> [2017]                                      |
| Biomass burning     |                          | <i>Sherwood et al.</i> [2017]                                                                         |                               |                                                                    |
| Termites            | -57                      | <i>Miller</i> [2005]                                                                                  | -343                          | <i>Sherwood et al.</i> [2017]                                      |
| Oceans              | -58                      | <i>Miller</i> [2005]                                                                                  | -220                          | <i>Whiticar and Schaefer</i> [2007]                                |
| Hydrates            | -62.5                    | <i>Whiticar and Schaefer</i> [2007]                                                                   | -190                          | <i>Whiticar and Schaefer</i> [2007]                                |
| Other geological*   | -33                      | <i>Etioppe et al.</i> [2008]                                                                          | -200                          | <i>Whiticar and Schaefer</i> [2007]                                |
| OH oxidation        | -3.9                     | <i>Saueressig et al.</i> [2001];<br><i>Gierczak et al.</i> [1997];<br><i>Saueressig et al.</i> [2001] | -233                          | <i>DeMore</i> [1993]                                               |
| Soil uptake         | -18                      | <i>Snover and Quay</i> [2000]                                                                         | -80                           | <i>Snover and Quay</i> [2000]                                      |
| Stratospheric loss  | -15.5                    | <i>Röckmann et al.</i> [2011]                                                                         | -152                          | <i>Röckmann et al.</i> [2011]                                      |
| Cl                  | -66.0                    | <i>Saueressig et al.</i> [1995]                                                                       | -508                          | <i>Saueressig et al.</i> [1996]                                    |

<sup>a</sup> Tropical value following *Whiticar and Schaefer* [2007], and the offset of -15‰ for extra-tropical wetlands follows the regional averages in the data compilation of *Sherwood et al.* [2017].

\* calculated using mean values as a weighted sum of estimated source strength and measured isotope values for mud volcanoes, microseepage, geothermal and marine seeps.

<sup>165</sup> **Table S3.** Methane source and sink isotopic signature uncertainty estimates ( $\pm 1$  s.d.) and references.

|                     | $\delta^{13}\text{CH}_4$ | References                      | $\delta\text{D}(\text{CH}_4)$ | References                      |
|---------------------|--------------------------|---------------------------------|-------------------------------|---------------------------------|
| Extra-trop. wetland | $\pm 5$                  | <i>Sherwood et al.</i> [2016]   | $\pm 20$                      | <i>Quay et al.</i> [1999]       |
| Tropical wetland    | $\pm 5$                  | <i>Sherwood et al.</i> [2016]   | $\pm 20$                      | <i>Quay et al.</i> [1999]       |
| Biomass burning     | $\pm 3$                  | <i>Sherwood et al.</i> [2016]   | $\pm 16$                      | <i>Snover et al.</i> [2000]     |
| Termites            | $\pm 3$                  | <i>Sherwood et al.</i> [2016]   | $\pm 20$                      | As wetlands                     |
| Oceans              | $\pm 5$                  | As wetlands                     | $\pm 20$                      | As wetlands                     |
| Hydrates            | $\pm 7$                  | <i>Fischer et al.</i> [2008]    | $\pm 5$                       | <i>Fischer et al.</i> [2008]    |
| Other geological*   | $\pm 5$                  | <i>Etiopie et al.</i> [2008]    | $\pm 5$                       | as hydrates                     |
| OH oxidation        | $\pm 0.2$                | <i>Saueressig et al.</i> [2001] | $\pm 9$                       | <i>Saueressig et al.</i> [2001] |
| Soil uptake         | $\pm 1$                  | <i>Snover and Quay</i> [2000]   | $\pm 30$                      | <i>Snover and Quay</i> [2000]   |
| Stratospheric loss  | $\pm 1.2$                | <i>Röckmann et al.</i> [2011]   | $\pm 6$                       | <i>Röckmann et al.</i> [2011]   |
| Cl                  | $\pm 2$                  | <i>Saueressig et al.</i> [1995] | $\pm 31$                      | <i>Saueressig et al.</i> [1996] |

\* calculated using ranges with a weighted sum of estimated source strength and measured isotope values for mud volcanoes, microseepage, geothermal and marine seeps.

166

**Table S4.** Methane sources and sinks and the prescribed isotopic signatures and the weighted source and sink isotopic signatures.

|                                                  | Late Pre-Ind | LGM               | $\Delta$ LGM |
|--------------------------------------------------|--------------|-------------------|--------------|
| Sources (TgCH <sub>4</sub> yr <sup>-1</sup> )    |              | mean              | %            |
| N. extra-tropical wetland                        | 55           | 18                | -67          |
| Tropical wetland                                 | 73           | 55                | -25          |
| S. extra-tropical wetland                        | 11           | 13                | 18           |
| Biomass burning                                  | 21           | 13.5(2,18)        | -36(-90,-14) |
| Termites                                         | 20           | 12                | -40          |
| Oceans                                           | 1            | 0.8               | -20          |
| Hydrates                                         | 10           | 10                | 0            |
| Other geological*                                | 10           | 10                | 0            |
| Sum                                              | 201          | 139               | -31          |
| Source weighted $\delta^{13}\text{C}$ (‰)        | -53.3        | -51.2             | -            |
| Source weighted D(‰)                             | -322.7       | -307.4            | -            |
| Sinks (yr)                                       |              |                   |              |
| OH oxidation                                     | 10.4         | 11.2 <sup>a</sup> | 6            |
| Soil uptake                                      | 480          | 536               | +12          |
| Stratospheric loss                               | 298          | 286               | -4           |
| Marine boundary layer Cl                         | 961          | 834               | -13          |
| Total lifetime                                   | 9.7          | 10.3 <sup>b</sup> | 5            |
| Weighted $\delta^{13}\text{C}$ fractionation (‰) | -5.2         | -5.4              | -            |
| Weighted $\delta\text{D}$ fractionation (‰)      | -230.0       | -230.5            | -            |

Refer to tables S2 and S3 for references.

<sup>a</sup> The change in fire is used to determine the lifetime increase at the LGM following the three simulations for which fire CH<sub>4</sub> emissions for the LGM were prescribed as 10%, 66% and 84% of the late pre-industrial flux, leading to OH lifetime changes (LGM-PI) of +2.2, +5.6 and +7.8% respectively.

<sup>b</sup> Shows standard-fire scenario value, lowfire=9.9 yr, standard+LGM humans=10.4 yr.
